# Supplementary material
Source: PubMed Central journal article supplement (PMC1087919)

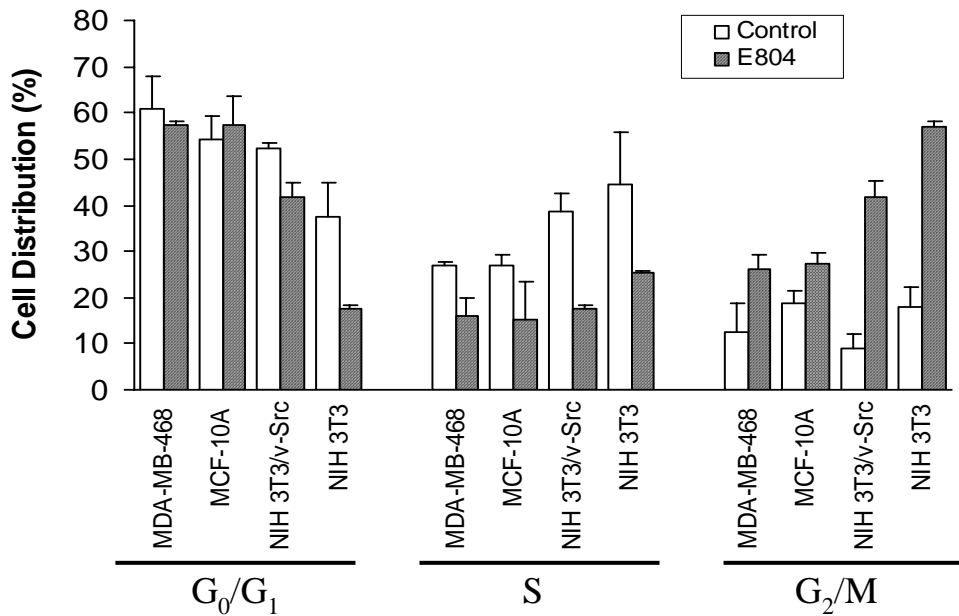

Supplement: pnas_102_17_5998__1.pdf [file pnas_102_17_5998__1.pdf]
